# Supplementary material
Source: PubMed Central journal article supplement (PMC5660934)
Supplement: NIHMS872500-supplement-12035_2017_556_MOESM1_ESM.pdf [file NIHMS872500-supplement-12035_2017_556_MOESM1_ESM.pdf]

## SUPPLEMENTAL MATERIALS

### Genetic Deletion of Krüppel-Like Factor 11 Aggravates Ischemic Brain Injury

Xuelian Tang<sup>1,2</sup>, Kai Liu<sup>1</sup>, Milton H. Hamblin<sup>3</sup>, Yun Xu<sup>2</sup>, Ke-Jie Yin<sup>1\*</sup>

#### SUPPLEMENTAL FIGURE LEGENDS

**Supplementary Table 1: The specific primers for real time PCR**

**Supplementary Figure 1: Expression of PPAR $\gamma$  protein level in brains of KLF11 KO mice after focal cerebral ischemia.** Western blotting data show PPAR $\gamma$  protein level in lysates from cerebral cortex of KLF11 KO and WT mice after 1h MCAO followed by 24h reperfusion. Compared to KLF11 WT controls, there are no significant changes of PPAR $\gamma$  protein levels in brains of KLF11 KO mice at sham or ischemic condition. Representative data are shown from three separate experiments.

### Supplemental Table 1: PCR primers

| Gene          | Forward Primer                  | Reverse Primer                |
|---------------|---------------------------------|-------------------------------|
| KLF1          | 5'-CGGGAAGAGCTACACCAAGA-3'      | 5'-GAAGGGACGATGTCCAGTGT-3'    |
| KLF2          | 5'-ACCAAGAGCTCGCACCTAAA-3'      | 5'-GTGGCACTGAAAGGGTCTGT-3'    |
| KLF3          | 5'-CCCCCTTTAATGAACCCAGT-3'      | 5'-GGTGCATTTGTACGGCTTTT-3'    |
| KLF4          | 5'-CTGAACAGCAGGGACTGTCA-3'      | 5'-GTGTGGGTGGCTGTTCTTTT-3'    |
| KLF5          | 5'-ACGTACACCATGCCAAGTCA-3'      | 5'-GTGGGAGAGTTGGCGAATTA-3'    |
| KLF6          | 5'-TCCACACCTCCATCTTCTCC-3'      | 5'-TGCTTTCAAGTGGGAGCTTT-3'    |
| KLF7          | 5'-TTGCTCTCTCGGGACAAGTT-3'      | 5'-GAGCTGAGGGAAGCCTTCTT-3'    |
| KLF8          | 5'-CTATCCTGGCCTCGTCTCAG-3'      | 5'-CCTCCAATGAGTGGGACAGT-3'    |
| KLF9          | 5'-ACAGTGGCTGTGGGAAAGTC-3'      | 5'-AACTGCTTTTCCCCAGTGTG-3'    |
| KLF10         | 5'-AGCAAGGGTCACTCCTCAGA-3'      | 5'-ACATGGGACAGGCCAACTTC-3'    |
| KLF11         | 5'-GGGGAGAAGCCTTTTACCTG-3'      | 5'-AGCCTGGGATCTTCTTGTT-3'     |
| KLF12         | 5'-TCCCTGTGGTGGTACAGTCA-3'      | 5'-AAGGTCACATTTGGCAGGTC-3'    |
| KLF13         | 5'-GGAAATCTTCGCACCTCAAG-3'      | 5'-GGCAGCTGAACTTCTTCTCG-3'    |
| KLF14         | 5'-CCTCAAGTCACACCAGCGTA-3'      | 5'-CGACCTCGGTACTCGATCAT-3'    |
| KLF15         | 5'-GAAGCAGGAGGCAGGTACAG-3'      | 5'-CACAACTTTGAGGGCAGGT-3'     |
| KLF16         | 5'-TGGCTGTGACAAGAAGTTCG-3'      | 5'-CTAGGTGTGGGGCTTCCAG-3'     |
| KLF17         | 5'-GGAGACAGTCCCCAGTTTCA-3'      | 5'-TCGCATTTATGTGGTCCGTA-3'    |
| IL-6          | 5'-AGTTGCCTTCTTGGGACTGA-3'      | 5'-TCCACGATTTCCAGAGAAC-3'     |
| TNF- $\alpha$ | 5'-CTCCTCACCCACACCGTCAGC-3'     | 5'-AACACCCATTCCCTTACAGAGCA-3' |
| ICAM-1        | 5'-TTCACACTGAATGCCAGCTC-3'      | 5'-GTCTGCTGAGACCCCTCTTG-3'    |
| MCP-1         | 5'-GCACCAGCACCAGCCAACTCTCACT-3' | 5'-CATTCTTCTTGGGGTCAGCACAG-3' |
| CYCLOPHILIN   | 5'-ACTCCTCATTTAGATGGGCATCA-3'   | 5'-GAGTATCCGTACCTCCGCAAA-3'   |

### Supplemental Table 1

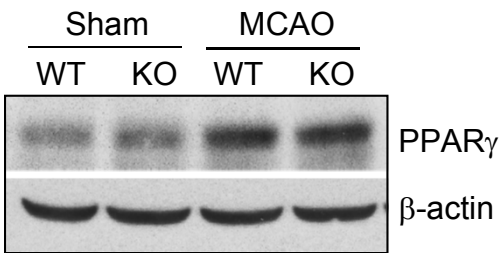

Supplemental Figure 1
